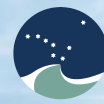

## The impact of changes in North Atlantic Gyre distribution on water mass characteristics in the Rockall Trough

Toby J. Sherwin<sup>1\*</sup>, Jane F. Read<sup>2</sup>, N. Penny Holliday<sup>2</sup>, and Clare Johnson<sup>1</sup>

<sup>1</sup>Scottish Association for Marine Science, Scottish Marine Institute, Oban PA37 1QA, UK

<sup>2</sup>National Oceanography Centre, Southampton, Waterfront Campus, Southampton SO14 3ZH, UK

\*Corresponding Author: tel: +44 1631 559336; fax: +44 1631 559001; e-mail: [toby.sherwin@sams.ac.uk](mailto:toby.sherwin@sams.ac.uk)

Sherwin, T. J., Read, J. F., Holliday, N. P., and Johnson, C. 2012. The impact of changes in North Atlantic Gyre distribution on water mass characteristics in the Rockall Trough. – ICES Journal of Marine Science, 69: 751–757.

Received 26 May 2011; accepted 4 October 2011; advance access publication 13 December 2011.

Regular time-series of temperature and salinity in the upper waters of the northern Rockall Trough can be traced back to 1948, when Ocean Weather Ships on passage to the west began to record them. Since 1975, these data have been complemented by, then replaced by, dedicated Conductivity, Temperature, and Depth sections along 57.5°N. Today, they are enhanced with real-time observations of the upper 1000 m made by an underwater glider. Since 1995, there has been a steady increase in both temperature (from 9.1 to 10°C) and salinity (from 35.32 to 35.41) as the Subpolar Gyre has retreated west. The historical record suggests that such increases could be compatible with decadal scales of natural variability. Nutrient (nitrate, phosphate, and silicate) concentrations have been measured systematically since 1996 and exhibit interannual variability, particularly in nitrate, the causes of which are not immediately clear. Average phosphate concentrations in the upper 800 m declined from 0.80 to 0.63 μM by 2009, consistent with the recent incursion of depleted Subtropical Gyre water. The Ellett Line dataset contains a unique and essential archive of observations that can be used to place in context the recent changes in local ocean climate.

**Keywords:** North Atlantic Gyres, nutrients, physical oceanography, regional climate change, Rockall Trough.

### Introduction

About half the warm, saline North Atlantic water crossing over the Greenland–Scotland Ridge into the Nordic Seas, as part of the northern limb of the Atlantic thermohaline circulation, passes through the Rockall Trough (Figure 1a). This trough is typically 200 km wide and ~3000 m deep in the south, shallowing to ~1000 m at the base of the Wyville Thomson Ridge in the north. The shelves on the eastern and western sides are both of the order of 200 m deep.

About 3 Sv ( $3 \times 10^6 \text{ m}^3 \text{ s}^{-1}$ ) of the north-flowing Eastern North Atlantic Water (ENAW) in the upper 500–700 m is usually constrained in a narrow band along the edge of the European shelf (Figure 1b and c; Booth and Ellett, 1983; Holliday *et al.*, 2000). A further ~0.6 Sv of ENAW travels northwards over the deep water. In the northern part of the Trough, the intermediate depths down to 1000 m are occupied by Wyville Thomson Ridge Overflow Water (WTOW), particularly on the western side (Johnson *et al.*, 2010). Beneath 1000 m are recirculating deep waters with origins in the Labrador Sea (LSW) and the Antarctic (AABW).

The hydrography of a section along ~57.5°N between Scotland and Rockall (the Ellett Line; Figure 2) has been monitored since

1975, with the Scottish Association for Marine Science (SAMS), formerly Dunstaffnage Marine Laboratory and led by David Ellett, initially completing up to four Conductivity, Temperature, and Depth (CTD) sections a year. The line was extended to Iceland by the National Oceanography Centre, Southampton (NOCS), in 1995, but its frequency dropped to typically once per year. Additional sections have been occasionally undertaken by Marine Scotland Science. Regular nutrient observations of nitrate (NO<sub>3</sub>, which has usually been combined with nitrite, NO<sub>2</sub>, and is here denoted as NO<sub>2+3</sub>), phosphate (PO<sub>4</sub>), and silicate (SiO<sub>3</sub>) began in 1996.

In addition to the Ellett Line, surface temperature and salinity observations across the Trough were measured by Ocean Weather Ships (OWS) on passage to the Iceland Basin and east of Greenland between 1948 and 1994. A further source of historical surface temperatures is the HadSST2 database, which is compiled from many opportunistic observations dating back to 1859, made mainly for the purposes of weather prediction and climate modelling (Figure 2).

The aim of this paper is to summarize the recent trends and variations in the temperature and, in particular, salinity of the upper 800 m of the Rockall Trough over the past 36 years, and

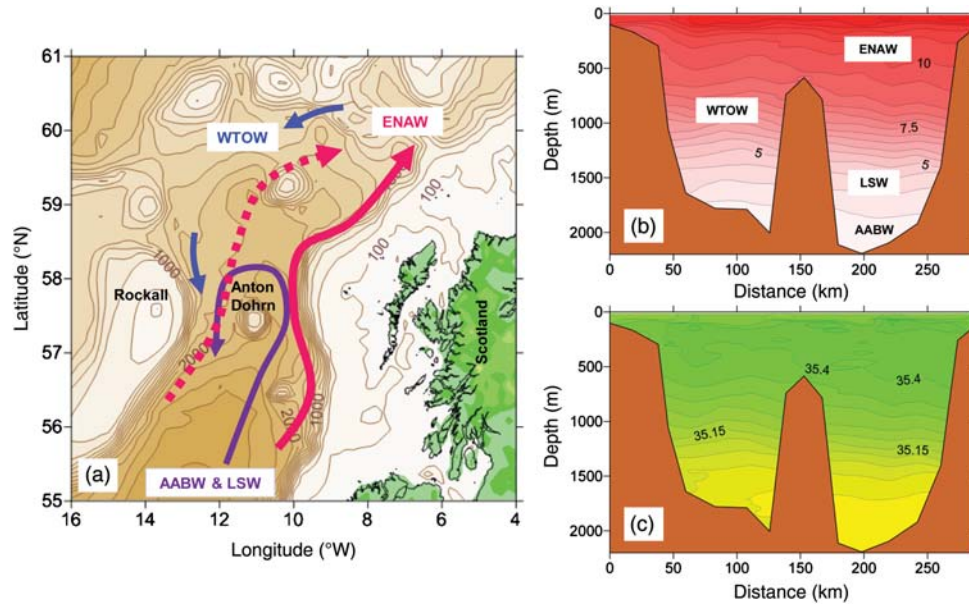

**Figure 1.** The Rockall Trough: (a) the main water transport pathways; (b) temperature section in October 2006 showing the water masses (ENAW, Eastern North Atlantic Water; WTOW, Wyville Thomson Ridge Overflow Water; LSW, Labrador Sea Water; AABW, Antarctic Bottom Water); (c) salinity section in October 2006.

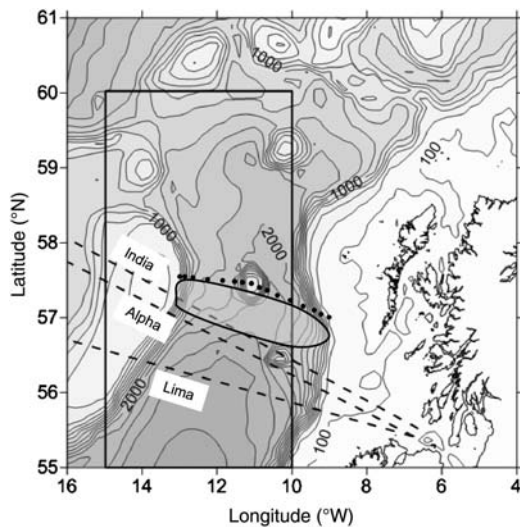

**Figure 2.** The Rockall Trough, showing the various data sources used here. The dotted line shows the Ellett Line stations from Scotland to Rockall, the rectangle covers the area averaged in HadSST2, and the dashed lines are the tracks of the OWS on passage from the Clyde to their respective Ocean Weather Stations (indicated). The oblate region is the area covered by the glider in 2009/10.

to examine the extent to which these observations can be extrapolated back to 1948. Changes in the concentrations of nutrients since 1996 and their possible links to water mass changes are also examined.

## Methods

Full-depth Ellett Line section temperature ( $\theta$ ) and salinity ( $S$ ) data were initially collected with a Bissett Berman STD digital recording profiler which was upgraded to a Bissett Berman 9040 CTD in 1978. Since 1991, pumped SeaBird CTDs have been used. All

**Table 1.** Summary of the major relevant events during the period that OWS traversed the Rockall Trough (from Ellett and Jones, 1994).

|      |                                                                                                                                               |
|------|-----------------------------------------------------------------------------------------------------------------------------------------------|
| 1946 | Start of ocean weather station programme at "Alpha" (east Greenland), "India" (NW of Rockall), and "Lima" (West of Rockall) using four ships  |
| 1948 | Collection of underway surface sampling commenced with $\theta_{OWS}$ and $S_{OWS}$ collected from towed sample bottles and salinity titrated |
| 1956 | Inboard sampling commenced with a mercury-in-glass thermometer (salinity titrations continued)                                                |
| 1961 | Thermistor temperature and thermostat salinometer sampling began                                                                              |
| 1965 | Autolab salinometer introduced                                                                                                                |
| 1975 | Stations "Alpha" and "India" closed and the number of ships reduced to 2                                                                      |
| 1982 | Number of ships reduced to 1                                                                                                                  |
| 1986 | Guildline autosal salinometer introduced                                                                                                      |
| 1994 | Station "Lima" closed, end of record                                                                                                          |

data have been calibrated to international standards and archived at the British Oceanographic Data Centre (BODC). A critical evaluation of the quality of the data up to 2000 has led to some of the earlier sections being rejected (Holliday, 2002). Section means of these data in the upper 800 m of the water column, and at the density turning point at a depth of  $\sim 1700$  m (i.e. in the LSW; Figure 1b), are reported annually in the ICES Report on Ocean Climate (e.g. Hughes *et al.*, 2010). Further information about the Ellett Line can be found at [www.noc.soton.ac.uk](http://www.noc.soton.ac.uk), and all calibrated data and cruise reports are available from BODC.

Between 1946 and 1994, OWS operated by the UK Meteorological Office out of the Clyde, Scotland, occupied permanent weather stations in the Iceland Basin and off Greenland (Table 1). From 1948 on, these ships made routine observations

of surface temperature and salinity across the Rockall Trough. The data collected up to 1992 were comprehensively synthesized, analysed, and tabulated by Ellett and Jones (1994) and are used here to examine the historical  $\theta$  and  $S$  record. Although the sampling methodology developed during this period, the number of weather stations and ships involved gradually reduced, leading to a southward movement in the location of these observations over time (Figure 2, Table 1). From 1975 on, the only remaining track was towards station *Lima* (57°N 20°W) and  $\sim 1.5^\circ$  south of the Ellett Line (Figure 2).

The HadsST2 dataset is a historical archive of sea surface temperature measured by ships and buoys back to 1850 that is based on the International Comprehensive Ocean-Atmosphere Data Set (1850–1997) and the US National Centers for Environmental Prediction—Global Telecommunications System (1998 on). The data are averaged by month onto a  $5^\circ \times 5^\circ$  grid, and unreasonable biases and trends attributable to changes in instrumentation have been removed. Data are available from the UK Meteorological Office website ([www.metoffice.gov.uk](http://www.metoffice.gov.uk)). A full explanation of the procedures used is given in Rayner *et al.* (2006).

In October 2009, SAMS made the first operational deployment of an underwater glider in waters to the west of the British Isles using a Seaglider from Seaglider Fabrication (Eriksen *et al.*, 2001). The glider was released into the shelf waters west of Scotland in October 2009 and patrolled the Rockall Trough just south of the Ellett Line for 5 months, up to March 2010. It reported temperature and salinity at intervals of  $\sim 5$  m to a depth of 1000 m roughly every 6 h in real time. The glider used unpumped Seabird Electronics SBE temperature and conductivity sensors, and calibration coefficients determined by the manufacturer before and after the mission were applied to the salinity observations. These data are archived at BODC.

One of the main challenges to defining long-term change in the Rockall Trough is the choice of appropriate metrics, particularly for observations after 2000, when winter cruises ceased and reported observations are likely to have had a warm, saline bias. In their analysis of the OWS data, Ellett and Jones (1994) found that the monthly mean surface temperature ranged through  $3.5^\circ\text{C}$ , from  $<10^\circ\text{C}$  in March to  $\sim 13.5^\circ\text{C}$  in August, and that surface salinity ranged through 0.07 from a minimum of 35.33 in September/October, rising to 35.40 in May. To minimize the seasonal impact, Hughes *et al.* (2010) use cross-sectional averages of Ellett Line temperature and salinity integrated between the eastern and western boundaries of the Trough and between depths of 30 and 800 m (denoted by  $\theta_{800}$  and  $S_{800}$ , respectively). As there are relatively few Ellett Line sections, we have used a statistical approach to estimate the equivalent seasonal ranges by binning all observations by month before computing the averages and standard deviations ( $\sigma_\theta$  and  $\sigma_S$  in Table 2). These annual ranges (defined for our purposes as  $2\sqrt{2}\sigma_\theta$  and  $2\sqrt{2}\sigma_S$ ) are

**Table 2.** Mean and standard deviation ( $\sigma$ ) of temperature and salinity estimates in the Rockall Trough, derived directly from the time-series shown later in Figure 4.

| Parameter             | Mean | $\sigma_\theta$ | Parameter        | Mean  | $\sigma_S$ |
|-----------------------|------|-----------------|------------------|-------|------------|
| $\theta_{800}$        | 9.28 | 0.25            | $S_{800}$        | 35.33 | 0.040      |
| $\theta_{\text{OWS}}$ | 9.82 | 0.29            | $S_{\text{OWS}}$ | 35.39 | 0.036      |
| $\theta_{\text{SST}}$ | 9.49 | 0.44            |                  |       |            |

For the purpose of objectivity, the  $\theta_{\text{OWS}}$  standard deviation includes the dubious 1956–1961 mercury-in-glass temperature observations.

estimated to be  $0.7^\circ\text{C}$  and 0.06 units, smaller than those at the surface, particularly for temperature. Therefore, although averaging to 800 m involves a small contribution from WTOW in the lower part of the water column, it is clear that  $\theta_{800}$  and  $S_{800}$  are better metrics than the equivalent surface ones.

## Results and discussion

### Variations in temperature and salinity in the upper 800 m since 1975

Between 1975 and 1995,  $\theta_{800}$  remained fairly steady, with an average temperature of  $\sim 9.1^\circ\text{C}$ , but it then increased steadily at  $\sim 0.1^\circ\text{C}$  per year to a (summer) peak of close to  $10^\circ\text{C}$  in 2006 (Figure 3). Since then the warming appears to have ceased, and temperatures may be getting cooler. At about the same time (from 1995 to 2005), salinity values also increased at  $\sim 0.01$  per year (from  $\sim 35.32$  to 35.41), but since 2005 they have remained fairly steady. These recent trends are consistent with those in other parts of the eastern North Atlantic and Nordic Seas (Holliday *et al.*, 2008; Hughes *et al.*, 2010) and have been linked to the westward retreat of the Subpolar Gyre and Subpolar Front in the mid-Atlantic (Hakkinen and Rhines, 2004; Hátún *et al.*, 2005).

However, the Ellett Line time-series are relatively short and leave one with the intriguing question of whether the recent peaks are unprecedented in modern times, and hence attributable to anthropogenic warming of the climate, or whether they are simply part of a natural cycle. To answer this question, we need to investigate other, possibly less robust, time-series.

### The OWS surface temperature and salinity

Following Ellett *et al.* (1986), we use OWS surface measurements of temperature and salinity ( $\theta_{\text{OWS}}$  and  $S_{\text{OWS}}$ ) averaged over the winter months of January, February, and March (JFM) when the upper the winter months column is closest to being well mixed, and surface values are likely to be near the underlying  $\theta_{800}$  and  $S_{800}$ . These two measures are not identical because (as the monthly averaged glider data—not shown—indicate) winter convection progressively mixes the water column through to March and because the OWS sections lie south of the Ellett Line. Sampling methods will also lead to differences.

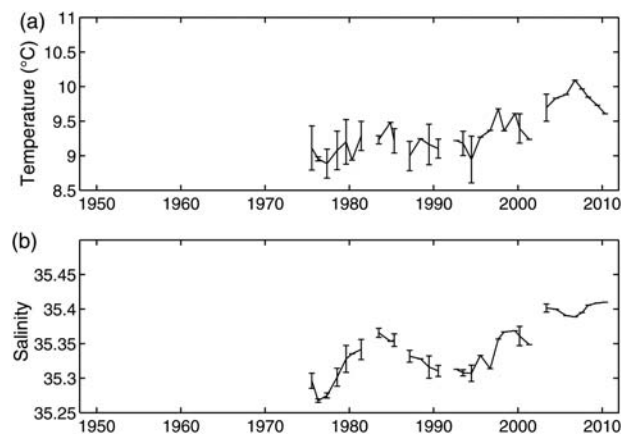

**Figure 3.** Annual mean values of (a)  $\theta_{800}$  and (b)  $S_{800}$  since 1975. The error bars show the standard deviation for the years when there was more than one cruise; there are no error bars for later years when there was just one cruise.

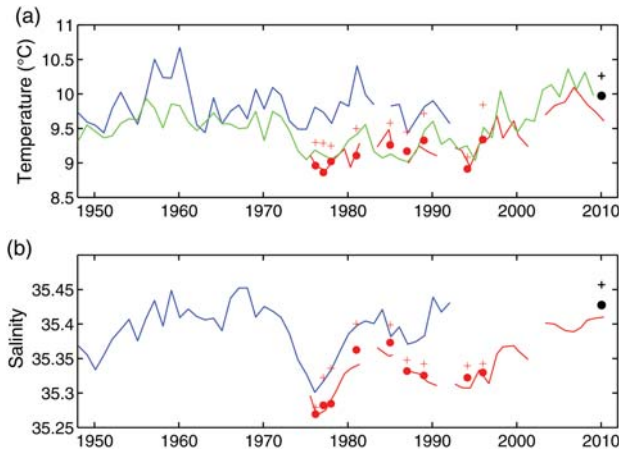

**Figure 4.** Historical time-series of (a) temperature and (b) salinity in the Rockall Trough since 1948. Red lines,  $\theta_{800}$  and  $S_{800}$ ; blue lines,  $\theta_{OWS}$  and  $S_{OWS}$  for winter (JFM); green line,  $\theta_{SST}$  for JFM. Dots and plus signs indicate the JFM values of  $\theta_{800}$  and  $S_{800}$  and  $\theta_4$  and  $S_4$ , respectively, from Ellett Line cruises (red) and from the glider (black). See text for definitions of the variables.

Although the  $\theta_{OWS}$  had a mean value of  $9.82^\circ\text{C}$  (Table 2), for most of the time, it fluctuated around  $9.75^\circ\text{C}$  (Figure 4). The exception to this, the period 1956–1961 when  $\theta_{OWS}$  rose rather abruptly to  $10.3^\circ\text{C}$ , coincided with the use of inboard mercury-in-glass thermometers, which renders these values suspect. The mean  $S_{OWS}$  was 35.39. To examine the impact of surface vs. deep-water sampling, observations of  $\theta_{800}$  and  $S_{800}$  from winter Ellett Line cruises have been averaged over JFM along with similar depth averages over the top 4 m ( $\theta_4$  and  $S_4$ ) to represent equivalent surface sampling (Figure 4). They indicate that although between 1975 and 1986 there was very good agreement between  $S_4$  and  $S_{OWS}$ , at other times  $\theta_{OWS}$  was up to  $0.5^\circ\text{C}$  warmer than  $\theta_4$ .

The early part of this period coincided with the end of OWS “India” and “Alpha”, and the subsequent observations by OWS “Lima” were  $\sim 1^\circ$  of latitude farther south. The climatological winter meridional surface temperature and salinity gradients at  $57^\circ\text{N}$  are  $\sim 0.25^\circ\text{C}$  and 0.015 per degree of latitude, respectively ([www.esrl.noaa.gov/psd/](http://www.esrl.noaa.gov/psd/)), which would imply a relative increase in  $\theta_{OWS}$  and  $S_{OWS}$  of only  $0.25^\circ\text{C}$  and 0.015 units at most. Therefore, perhaps even after the replacement of the mercury-in-glass thermometer by a thermistor in 1961, the  $\theta_{OWS}$  water was warmed along the intake pipe. Paradoxically from 1986, when a Guildline Autosol Salinometer was introduced, the difference between  $\theta_{OWS}$  and  $\theta_4$  decreased, but  $S_{OWS}$  became up to 1 unit more saline than  $S_4$  (much more than can be explained by simple climatology). However, it is not clear from the temperature salinity plots (not shown) whether these anomalous readings were due to the changes in technology or to unusual environmental conditions.

### The HadSST2 record

Monthly HadSST2 data are provided averaged over a rectangle bounded by  $10^\circ$  and  $15^\circ\text{W}$  and by  $55^\circ$  and  $60^\circ\text{N}$  (Figure 2). This region includes a large part of the Rockall Trough, but as it is centred on  $57^\circ\text{N}$ , there should be little meridional bias. However, it also covers the Rockall Bank, which can be relatively cool in winter (Ellett, 1968), and omits the warm shelf-edge current water (Figure 1b) so it is likely that winter sea surface

temperatures (SSTs) are a little cooler than those found from averaging across the Rockall Trough. The JFM averages of HadSST2 SST observations ( $\theta_{SST}$ ) were nevertheless very similar to  $\theta_{800}$  from 1975 on and to  $\theta_{OWS}$  from 1962 to 1973 and 1985 to 1992. At other times (i.e. the period between 1956 and 1961 and the period around 1980),  $\theta_{OWS}$  values were significantly warmer than  $\theta_{SST}$ . The earlier of these anomalously warm periods coincides with the time when the OWS started using inboard mercury-in-glass thermometers, which reinforces the belief that there is a problem with those measurements.

### A synthesis of the temperature and salinity time-series

The variation in the mean temperatures reported by the three methods of observation is large (nearly  $0.5^\circ\text{C}$ ; Table 2), but this can be attributed as much to the different methods of measurement and location as to environmental factors. However, their individual variability, as measured by  $\sigma_\theta$  and  $\sigma_S$ , is fairly similar. This similarity of magnitude may indicate that there has been little discernible change in the natural decadal variability of the temperature regime over the past 60 years. The difference in the mean values of  $S_{800}$  and  $S_{OWS}$  appears to be mainly attributable to the different parts of the water column sampled, but the similarity in their  $\sigma_S$  values also suggests that there has been little change in the magnitude of natural salinity variability over that time.

No attempt has been made to construct a synthetic time-series of the historical  $\theta_{800}$  in the central Rockall Trough given the uncertainties in some of the early  $\theta_{OWS}$  observations. However, the reasonably good match between  $\theta_{SST}$  and  $\theta_{800}$  from 1975 on implies that  $\theta_{SST}$  is a good proxy for  $\theta_{800}$  for winter conditions back to 1948. That being the case, it would appear that there are effectively three temperature regimes in the record: (i) a warm regime before 1974 when the mean  $\theta_{SST}$  was  $\sim 9.7^\circ\text{C}$ ; (ii) a cooler regime of  $\sim 9.2^\circ\text{C}$  that started in 1974 with the arrival of the Great Salinity Anomaly from the Labrador Sea (Ellett, 1980; Dickson *et al.*, 1988) and continued to 1995, after which (iii) there has been a progressive rise in  $\theta_{SST}$  to a maximum of  $>10^\circ\text{C}$  in the past 5 years as the Subpolar Gyre retreated. Whether this rise has now reversed is uncertain. Recent shipborne  $\theta_{800}$  observations suggest that it has, but observations of  $\theta_{800}$  and  $\theta_4$  by the glider during JFM of 2010 suggest that it has merely levelled off (Figure 4).

In contrast, the good fit between  $S_4$  and  $S_{OWS}$  during the period 1975–1985 gives some reason to believe (if the anomalously high values of  $S_{OWS}$  between 1985 and 1995 are accepted) that  $S_{OWS}$  may be a reasonable proxy for  $S_{800}$  before 1975. The most striking feature in the record remains the Great Salinity Anomaly, which was a 10-year event in the Rockall Trough that resulted in minimum salinities ( $S_{800} = 35.27$ ,  $S_{OWS} = 35.30$ ) in 1976. In contrast to  $\theta_{800}$ , which remained low for the next 20 years,  $S_{800}$  appears to have recovered its original values within 5 years of the minimum. Other smaller anomalies appear at the beginning of the record, in 1950 ( $S_{OWS} = 35.34$ ), and again in 1995 ( $S_{800} = 35.30$ ). Since then,  $S_{800}$  has increased to  $\sim 35.41$  in recent years as ENAW has gradually penetrated the Rockall Trough from the south, with the retreat of the Subpolar Gyre.

### Observations of nutrient concentrations in the Rockall Trough

Autoanalysers have been used in the analysis of full-depth nutrient sampling that started in 1996, and information about calibration techniques and results can be found in the relevant cruise reports on the BODC database. No detailed independent

assessment has been made of data quality, nor have laboratory intercomparison studies been conducted, so the size of any inter-cruise measurement errors is unknown.

As nutrients have non-conservative properties, they are not expected to be as robust water mass tracers as temperature and salinity. In addition to surface seasonal variations, which are also linked to the variations in temperature and salinity and are ignored for our purposes, long-term water column variability

may depend on biological activity. Therefore, we do not expect that all the spatial patterns or trends and temporal regimes seen in the physical variables will be reflected in the nutrient observations. Despite these caveats, there are enough independent sections to allow some long-term changes to be discerned.

Nutrient samples have been collected at typically 5–15 discrete levels in the water column, with a greater density of samples near the surface so, unlike the temperature and salinity observations, they are not continuous with depth. Synthetic nutrient profiles were derived by interpolating each cast onto 25-m intervals from 10 to 2330 m. Cross-sectional averages were created from these interpolated data. With an average of just one cruise per year, it is not possible to allow for seasonal variations in the surface waters. Nevertheless, as the dashed lines in Figure 5 show, the overall scatter is sufficiently small to generate confidence in the discussion of the broad features that follows.

Average near-surface nitrate and phosphate levels are generally depleted (Figure 5a and b), but below 100 m and down to 800 m, there is a slow rise in concentrations to  $\sim 14.7$  and  $\sim 0.9$   $\mu\text{M}$ , respectively. Through the next 200 m, i.e. in the deep pycnocline, concentrations increase rapidly in both nutrients to values of  $\sim 16.8$  and  $\sim 1.03$   $\mu\text{M}$ , respectively, but below 1000 m, they increase very slowly with depth.

Although silicate concentrations also exhibit an increase in concentration with depth (Figure 5c), their profile tends towards a more uniform increase in concentrations from  $\sim 5$   $\mu\text{M}$  near the surface to  $\sim 14$   $\mu\text{M}$  at 1700 m. At deeper levels, they increase rapidly to  $>22$   $\mu\text{M}$  at 2200 m (on the deeper eastern side of the Anton Dohrn seamount). Such high silicate levels confirm that bottom waters contain AABW, which has the highest silicate content in the ocean (Levitus *et al.*, 1993).

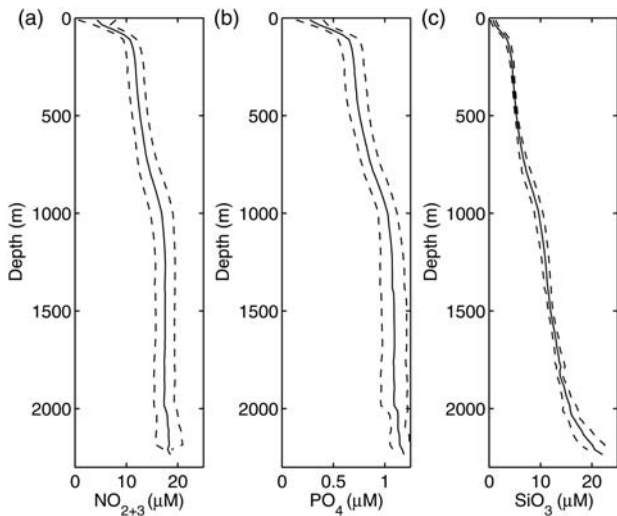

**Figure 5.** Mean profiles of (a) nitrate (plus nitrite), (b) phosphate, and (c) silicate concentrations between 1996 and 2009 (plain lines), and the spread of the observations at  $\pm 1$  s.d. about the mean (dashed lines).

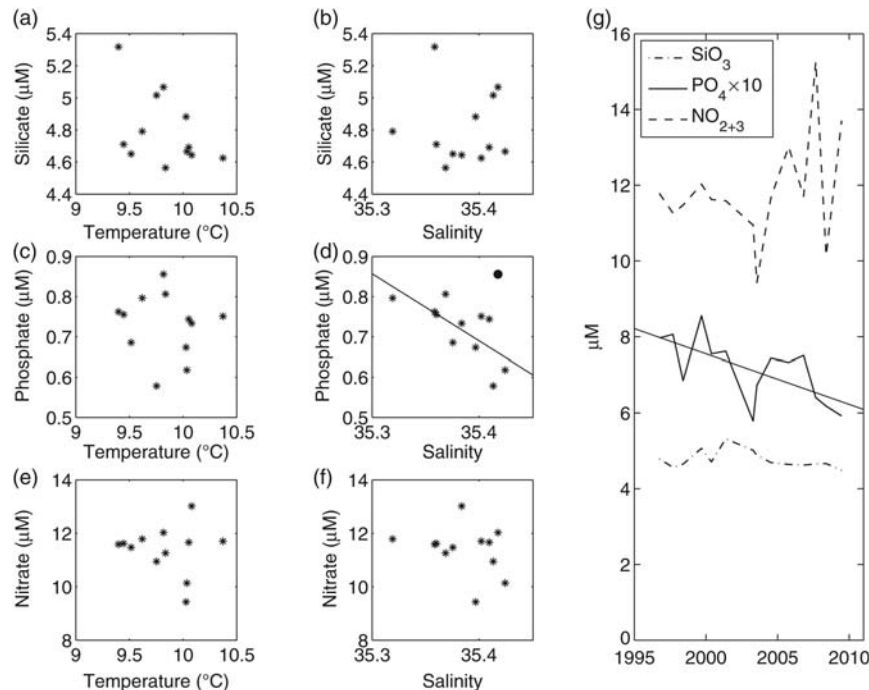

**Figure 6.** Mean concentrations in nutrients between 30 and 800 m for the period 1996–2009. (a)  $\text{SiO}_3$  vs.  $\theta_{800}$ ; (b)  $\text{SiO}_3$  vs.  $S_{800}$ ; (c)  $\text{PO}_4$  vs.  $\theta_{800}$ ; (d)  $\text{PO}_4$  vs.  $S_{800}$ ; (e)  $\text{NO}_{2+3}$  vs.  $\theta_{800}$ ; (f)  $\text{NO}_{2+3}$  vs.  $S_{800}$ ; (g) time-series of all three nutrients. The linear regression line in (d) omits the 1999 data (dot) and has regression coefficient  $r^2 = 0.50$ . The linear regression line in (g) has a  $\text{PO}_4$  decline of 0.013  $\mu\text{M}$  per year and  $r^2 = 0.44$ .

The depth mean concentrations (between 30 and 800 m) of  $\text{SiO}_3$  have remained fairly steady over the past 15 years at  $4.8 \pm 0.2 \mu\text{M}$  (Figure 6). In contrast, there is a fairly high interannual variability of the concentrations of  $\text{NO}_{2+3}$  ( $11.8 \pm 1.4 \mu\text{M}$ ) and  $\text{PO}_4$  ( $0.71 \pm 0.08 \mu\text{M}$ ). An explanation for this variability (and whether it has a natural or experimental basis) is beyond our scope, although Ellett and Martin (1973) found that the seasonal variation of silicate and phosphate profiles between 100 and 700 m ranged through  $\sim 1$  and  $0.1 \mu\text{M}$ , respectively. Summer concentrations were higher than in winter because the nutrient-depleted surface waters mix downwards in autumn. It is not possible to tell whether there has been any significant change in mean  $\text{NO}_{2+3}$  levels since 1996 (only the interannual variability has increased).

From linear regression, however, the mean  $\text{PO}_4$  concentrations have decreased at an average rate of  $0.013 \mu\text{M}$  per year, from  $0.80 \mu\text{M}$  in 1996 to  $0.63 \mu\text{M}$  in 2009. Ignoring 1999, when the maximum  $\text{PO}_4$  value of  $0.86 \mu\text{M}$  was observed, there is also a significant negative correlation ( $r^2 = 0.5$ ) between salinity and  $\text{PO}_4$  (Figure 6d). Therefore, this decrease can be linked to the retreat of the Subpolar Gyre and the incursion into the upper layers of the Rockall Trough of ENAW from the Subtropical Gyre, which is relatively depleted in phosphate (Levitus *et al.*, 1993).

## Conclusions

The upper waters of the Rockall Trough have undergone a series of significant interdecadal changes over the past 60 years which are summarized below.

- (i) A relatively warm period existed between 1948 and 1972, with winter surface temperatures of  $\sim 9.6^\circ\text{C}$ .
- (ii) Subsequently, there was a cooler period ( $9.2^\circ\text{C}$ ,  $\theta_{\text{SST}}$ ) until about 1995.
- (iii) The start of this cooler period (1972) coincided with the advent of the Great Salinity Anomaly, which itself lasted to about 1982 (minimum  $S_{800} = 35.27$ ).
- (iv) There was a second, less intense freshening in the early 1990s (minimum  $S_{800} = 35.30$ ).
- (v) A steady increase in  $\theta_{800}$  and  $S_{800}$  (to  $10^\circ\text{C}$  and 35.41) has persisted from 1995 to almost the present day. This phenomenon, which is reflected throughout the northern North Atlantic, is linked to a changing balance in Subpolar and Subtropical Gyre waters.
- (vi) Finally, there has been a steady decline in phosphate concentrations since 1996 (from 0.8 to  $0.6 \mu\text{M}$ ) that seems to be linked to the increase in Subtropical Gyre water.

Most of these changes are linked to the movement and exchange of water masses in the northern North Atlantic, and it is not possible to say whether the upward trends in heat and salinity of the 1990s and the 2000s in the Rockall Trough will restart following their recent slowdown and partial reversal. Further, it is uncertain whether the changes of the past 15 years lie outside the range of natural variability for the past 60 years or whether they can be attributed to anthropogenic warming. Set against this, though, Ellett and Martin (1973) noted that in the Rockall Trough, the mean winter surface temperatures to depths of 400 m or more between 1948 and 1965 were  $\sim 1^\circ\text{C}$  greater than those observed between 1876 and 1915 (reported in Smed,

1949). Notwithstanding the fact that we can have less confidence in the accuracy of the early observations, this increase is much greater than any temperature changes reported here.

Given this uncertainty, and the concerns about anthropogenic climate change, a very strong case can be made for continuing the Ellett Line, which is an essential sustained monitoring programme in the Rockall Trough. Looking into the future, we expect that there will be increasing use of gliders, which are much cheaper than research vessels and can patrol throughout winter. Although at present they are restricted to the top 1000 m and are unable to measure nutrients, technological developments are in hand that should overcome these limitations.

## Acknowledgements

It is impossible to identify and acknowledge all the individuals and institutions that have contributed to the data described here. Ellett Line cruises conducted by SAMS and NOCS have been funded by UK Natural Environment Research Council (NERC) since 1975. The present-day cruises, the glider mission, and this paper are supported by Sustained Observation programme No. 4 of NERC's Oceans2025 strategic marine science programme. The cruises by Marine Science Scotland are supported by the Scottish Government. The climatological surface temperature and salinity gradients were derived from images provided by the Physical Sciences Division, Earth System Research Laboratory, National Oceanic and Atmospheric Administration, Boulder, CO, from their website at [www.esrl.noaa.gov/psd/](http://www.esrl.noaa.gov/psd/).

## References

- Booth, D. A., and Ellett, D. J. 1983. The Scottish continental-slope current. *Continental Shelf Research*, 2: 127–146.
- Dickson, R. R., Meincke, J., Malmberg, S.-A., and Lee, A. J. 1988. The "Great Salinity Anomaly" in the northern North Atlantic 1968–82. *Progress in Oceanography*, 20: 103–151.
- Ellett, D. J. 1968. The cold "winter-water" of Rockall Bank. ICES Hydrographic Committee Document CM 1968/C: 24. 14 pp.
- Ellett, D. J. 1980. Long-term water-mass variations in the North-eastern Atlantic. ICES Hydrographic Committee Document CM 1980/C: 9. 17 pp.
- Ellett, D. J., Edwards, A., and Bowers, R. 1986. The hydrography of the Rockall Channel—an overview. *Proceedings of the Royal Society of Edinburgh, Section B: Biological Sciences*, 88: 61–81.
- Ellett, D. J., and Jones, S. R. 1994. Surface temperature and salinity time-series from the Rockall Channel, 1948–1992. *Fisheries Research Data Report 36*, UK Ministry of Agriculture, Fisheries and Food, Lowestoft. 24 pp.
- Ellett, D. J., and Martin, J. H. A. 1973. The physical and chemical oceanography of the Rockall Channel. *Deep Sea Research*, 20: 585–625.
- Eriksen, C. C., Osse, T. J., Light, R. D., Wen, T., Lehman, T. W., Sabin, P. L., Ballard, J. W., *et al.* 2001. Seaglider: a long-range autonomous underwater vehicle for oceanographic research. *IEEE Journal of Oceanic Engineering*, 26: 424–436.
- Hakkinen, S., and Rhines, P. 2004. Decline of the subpolar North Atlantic Gyre circulation during the 1990s. *Science*, 304: 555–559.
- Hátún, H., Sando, A. B., Drange, H., Hansen, B., and Valdimarsson, H. 2005. Influence of the Atlantic subpolar gyre on the thermohaline circulation. *Science*, 309: 1841–1844.
- Holliday, N. P. 2002. Interannual variability of the circulation and ventilation of the North Atlantic subpolar gyre. PhD thesis, University of Liverpool. 231 pp.
- Holliday, N. P., Hughes, S. L., Bacon, S., Beszczynska-Moller, A., Hansen, B., Lavin, A., Loeng, H., *et al.* 2008. Reversal of the 1960s to 1990s freshening trend in the northeast North Atlantic

- and Nordic Seas. *Geophysical Research Letters*, 35: L03614, doi:10.1029/2007GL032675.
- Holliday, N. P., Pollard, R. T., Read, J. F., and Leach, H. 2000. Water mass properties and fluxes in the Rockall Trough, 1975–1998. *Deep Sea Research I*, 47: 1303–1332.
- Hughes, S. L., Holliday, N. P., and Beszczynska-Möller, A. E. (Eds.). 2010. ICES Report on Ocean Climate 2009. ICES Cooperative Research Report, 304. 67 pp.
- Johnson, C., Sherwin, T., Smythe-Wright, D., Shimmield, T., and Turrell, W. 2010. Wyville Thomson Ridge Overflow Water: spatial and temporal distribution in the Rockall Trough. *Deep Sea Research I: Oceanographic Research Papers*, 57: 1153–1162.
- Levitus, S., Conkright, M. E., Reid, J. L., Najjar, R. G., and Mantyla, A. 1993. Distribution of nitrate, phosphate and silicate in the world oceans. *Progress in Oceanography*, 31: 245–273.
- Rayner, N. A., Brohan, P., Parker, D. E., Folland, C. K., Kennedy, J. J., Vanicek, M., Ansell, Y., *et al.* 2006. Improved analyses of changes and uncertainties in sea surface temperature measured *in situ* since the mid-nineteenth century: the HadSST2 data set. *Journal of Climate*, 19: 446–449.
- Smed, J. 1949. Monthly mean temperatures of the surface water in the areas of the north-eastern North Atlantic during the years 1876–1939 and 1945–1948. *Annales Biologiques*, Copenhagen, 5: 10–15.

*Handling editor: Bill Turrell*
